# Supplementary material for: Relationships between Physical Activity Frequency and Self-Perceived Health, Self-Reported Depression, and Depressive Symptoms in Spanish Older Adults with Diabetes: A Cross-Sectional Study
Source: MDPI journal article supplement (doi:10.3390/ijerph20042857), 2023-02-06
Supplement: s1 [file s1]

## Supplementary material

**Table S1.** Linear regression for Depression Symptoms.

| <b>EHIS 2014</b>     |                             |                    |            |        |        |        |  |
|----------------------|-----------------------------|--------------------|------------|--------|--------|--------|--|
| Explanatory variable | Unstandardized Coefficients |                    |            | Beta   | t      | Sig.   |  |
|                      | $\beta$                     | 95% CI for $\beta$ | Std. Error |        |        |        |  |
| (Constant)           | 1.291                       | 1.161 1.421        | 0.066      |        | 19.421 | <0.001 |  |
| PAF                  | -0.174                      | -0.217 -0.131      | 0.022      | -0.216 | -7.872 | <0.001 |  |
| Sex                  | 0.241                       | 0.177 0.305        | 0.033      | 0.202  | 7.378  | <0.001 |  |
| <b>EHIS 2020</b>     |                             |                    |            |        |        |        |  |
| Explanatory variable | Unstandardized Coefficients |                    |            | Beta   | t      | Sig.   |  |
|                      | $\beta$                     | 95% CI for $\beta$ | Std. Error |        |        |        |  |
| (Constant)           | 1.341                       | 1.275 1.407        | 0.034      |        | 39.795 | <0.001 |  |
| PAF                  | -0.083                      | -0.113 -0.052      | 0.016      | -0.140 | -5.326 | <0.001 |  |
| Sex                  | 0.134                       | 0.081 0.186        | 0.027      | 0.131  | 4.991  | <0.001 |  |

EHIS: European Health Survey Spain; B: Beta (Standardized coefficients); CI: Confidence interval; Std. Error: Standard error; t: t statistic; Sig: Significance; PAF: Physical Activity Frequency; Sex (Men=0; Women=1).

**Table S2.** Linear regression for Self-perceived Health

| <b>EHIS 2014</b>     |                             |                    |            |        |        |       |  |
|----------------------|-----------------------------|--------------------|------------|--------|--------|-------|--|
| Explanatory variable | Unstandardized Coefficients |                    |            | Beta   | t      | Sig.  |  |
|                      | $\beta$                     | 95% CI for $\beta$ | Std. Error |        |        |       |  |
| (Constant)           | 1.886                       | 1.719 2.052        | 0.085      |        | 22.278 | 0.000 |  |
| PAF                  | 0.299                       | 0.244 0.355        | 0.028      | 0.289  | 10.619 | 0.000 |  |
| Sex                  | -0.175                      | -0.257 -0.094      | 0.042      | -0.115 | -4.218 | 0.000 |  |
| <b>EHIS 2020</b>     |                             |                    |            |        |        |       |  |
| Explanatory variable | Unstandardized Coefficients |                    |            | Beta   | t      | Sig.  |  |
|                      | $\beta$                     | 95% CI for $\beta$ | Std. Error |        |        |       |  |
| (Constant)           | 2.683                       | 2.411 2.956        | 0.139      |        | 19.299 | 0.000 |  |
| PAF                  | 0.146                       | 0.101 0.191        | 0.023      | 0.166  | 6.361  | 0.000 |  |
| Sex                  | -0.171                      | -0.248 -0.094      | 0.039      | -0.114 | -4.360 | 0.000 |  |
| BMI                  | -0.015                      | -0.023 -0.007      | 0.004      | -0.097 | -3.719 | 0.000 |  |

EHIS, European Health Survey Spain;  $\beta$ , Beta (Standardized coefficients); CI, Confidence interval; Std. Error, Standard error; t, t statistic; Sig, Significance; PAF: Physical Activity Frequency; Sex (Men=0; Women=1).

**Table S3.** Educational level of the participants: EHSS2014

|                   |                                                                                              |   | Sex              |                  | Overall |
|-------------------|----------------------------------------------------------------------------------------------|---|------------------|------------------|---------|
|                   |                                                                                              |   | Men              | Women            |         |
| Educational Level | Cannot read or write                                                                         | n | 9 <sub>a</sub>   | 46 <sub>b</sub>  | 55      |
|                   |                                                                                              | % | 1.3%             | 7.3%             | 4.2%    |
|                   | Incomplete primary education (Attended less than 5 years of primary school)                  | n | 111 <sub>a</sub> | 191 <sub>b</sub> | 302     |
|                   |                                                                                              | % | 16.2%            | 30.2%            | 22.9%   |
|                   | Completed primary education                                                                  | n | 254 <sub>a</sub> | 249 <sub>a</sub> | 503     |
|                   |                                                                                              | % | 37.0%            | 39.4%            | 38.1%   |
|                   | First stage of Secondary Education, with or without a diploma (2nd year of secondary school) | n | 112 <sub>a</sub> | 69 <sub>b</sub>  | 181     |
|                   |                                                                                              | % | 16.3%            | 10.9%            | 13.7%   |
|                   | Post-secondary education                                                                     | n | 64 <sub>a</sub>  | 25 <sub>b</sub>  | 89      |
|                   |                                                                                              | % | 9.3%             | 4.0%             | 6.7%    |
|                   | Intermediate professional education or equivalent                                            | n | 22 <sub>a</sub>  | 12 <sub>a</sub>  | 34      |
|                   |                                                                                              | % | 3.2%             | 1.9%             | 2.6%    |
|                   | Higher professional education or equivalent                                                  | n | 33 <sub>a</sub>  | 6 <sub>b</sub>   | 39      |
|                   |                                                                                              | % | 4.8%             | 0.9%             | 3.0%    |
|                   | University studies or equivalent                                                             | n | 82 <sub>a</sub>  | 34 <sub>b</sub>  | 116     |
|                   |                                                                                              | % | 11.9%            | 5.4%             | 8.8%    |
|                   | Overall                                                                                      | n | 687              | 632              | 1319    |
|                   |                                                                                              | % | 100.0%           | 100.0%           | 100.0%  |

n (participantes); % (percentage); Each subscript letter denotes a subset of Sex categories whose column proportions do not differ significantly from each other at the .05 level.

**Table S4.** Educational level of the participants: EHSS2020

|                   |                                                                                              | Sex                |                  | Overall |
|-------------------|----------------------------------------------------------------------------------------------|--------------------|------------------|---------|
|                   |                                                                                              | Men                | Women            |         |
| Educational Level | Cannot read or write                                                                         | n 3 <sub>a</sub>   | 16 <sub>b</sub>  | 19      |
|                   |                                                                                              | % 15.8%            | 84.2%            | 100.0%  |
|                   | Incomplete primary education (Attended less than 5 years of primary school)                  | n 109 <sub>a</sub> | 148 <sub>b</sub> | 257     |
|                   |                                                                                              | % 42.4%            | 57.6%            | 100.0%  |
|                   | Completed primary education                                                                  | n 243 <sub>a</sub> | 231 <sub>a</sub> | 474     |
|                   |                                                                                              | % 51.3%            | 48.7%            | 100.0%  |
|                   | First stage of Secondary Education, with or without a diploma (2nd year of secondary school) | n 188 <sub>a</sub> | 140 <sub>a</sub> | 328     |
|                   |                                                                                              | % 57.3%            | 42.7%            | 100.0%  |
|                   | Post-secondary education                                                                     | n 84 <sub>a</sub>  | 45 <sub>b</sub>  | 129     |
|                   |                                                                                              | % 65.1%            | 34.9%            | 100.0%  |
|                   | Intermediate professional education or equivalent                                            | n 36 <sub>a</sub>  | 29 <sub>a</sub>  | 65      |
|                   |                                                                                              | % 55.4%            | 44.6%            | 100.0%  |
|                   | Higher professional education or equivalent                                                  | n 41 <sub>a</sub>  | 15 <sub>b</sub>  | 56      |
|                   |                                                                                              | % 73.2%            | 26.8%            | 100.0%  |
|                   | University studies or equivalent                                                             | n 95 <sub>a</sub>  | 57 <sub>b</sub>  | 152     |
|                   |                                                                                              | % 62.5%            | 37.5%            | 100.0%  |
|                   | Overall                                                                                      | n 799              | 681              | 1480    |
|                   |                                                                                              | % 54.0%            | 46.0%            | 100.0%  |

n (participantes); % (percentage); Each subscript letter denotes a subset of Sex categories whose column proportions do not differ significantly from each other at the .05 level.
